# Supplementary material for: Homogeneous continuous flow nitration of O -methylisouronium sulfate and its optimization by kinetic modeling
Source: publisher site journal article supplement (doi:10.3762/bjoc.20.205), 2024-09-24
Supplement: Additional file 1 [file 1860-5397-20-205-S1.pdf]

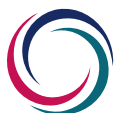

## Supporting Information

for

### **Homogeneous continuous flow nitration of O-methylisouronium sulfate and its optimization by kinetic modeling**

Jiapeng Guo, Weike Su and An Su

*Beilstein J. Org. Chem.* **2024**, *20*, 2408–2420. [doi:10.3762/bjoc.20.205](https://doi.org/10.3762/bjoc.20.205)

## Additional information

## Part 1. Effect of molar ratio

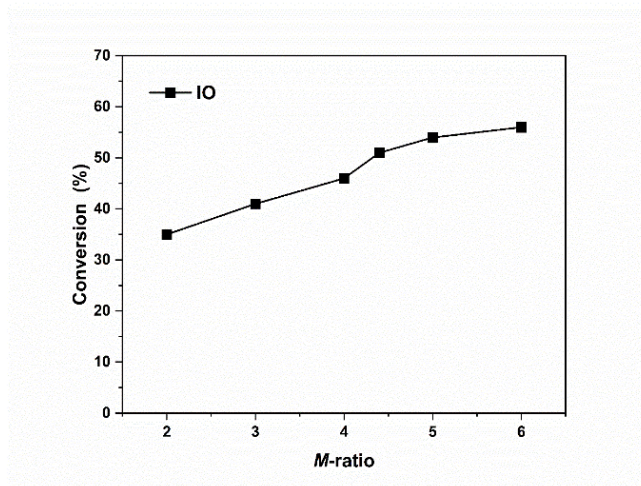

**Figure S1:** Variation of NIO conversion with  $\text{HNO}_3$  molar ratio. The conversion was determined by high performance liquid chromatography (HPLC).

## Part 2. Determination of the reaction orders

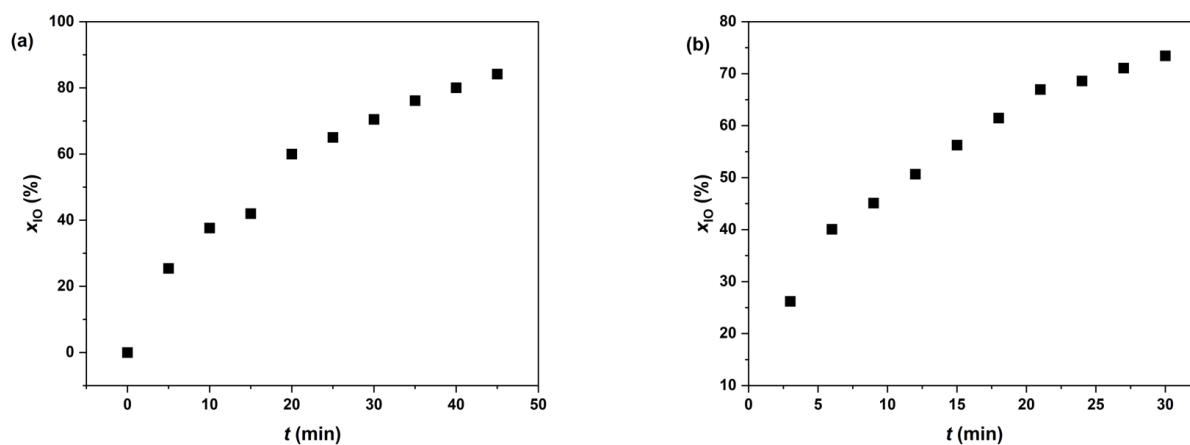

**Figure S2:** (a)  $x_{\text{IO}}$  versus reaction time ( $t$ ). (b)  $x_{\text{IO}}$  versus reaction time  $t$ . Determination of IO reaction order conditions: reaction temperature ( $T$ ) = 0 °C; initial concentration of reactants in reaction mixture:  $c_{\text{IO}_0} = 1$  mol/L,  $c_{\text{HNO}_3,0} = 15$  mol/L. Determination of  $\text{HNO}_3$  reaction order conditions: reaction temperature ( $T$ ) = 10 °C; initial concentration of reactants in reaction mixture:  $c_{\text{IO}_0} = 1$  mol/L,  $c_{\text{HNO}_3,0} = 4.4$  mol/L. The conversion was determined by high performance liquid chromatography (HPLC).

### Part 3. Apparent reaction rate

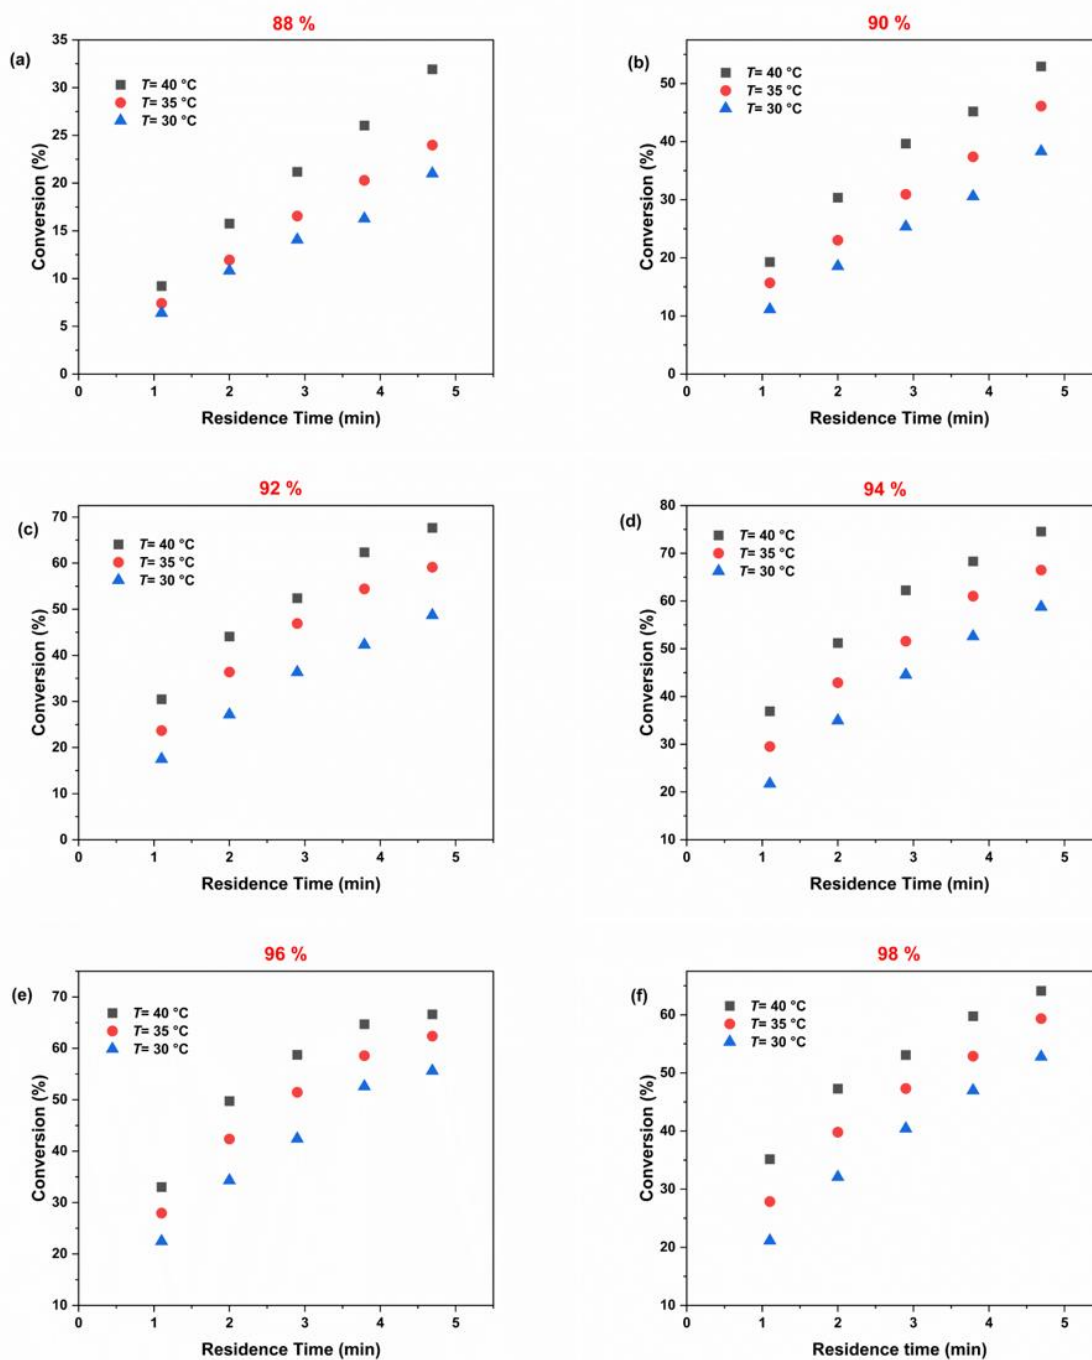

**Figure S3:** Variation of  $x_{10}$  with  $t$  at different temperatures (30 °C, 35 °C, 40 °C) and different  $H_2SO_4$  mass fractions (88%, 90%, 92%, 94%, 96%, 98%).

#### Part 4. Determination of $M_C$ function

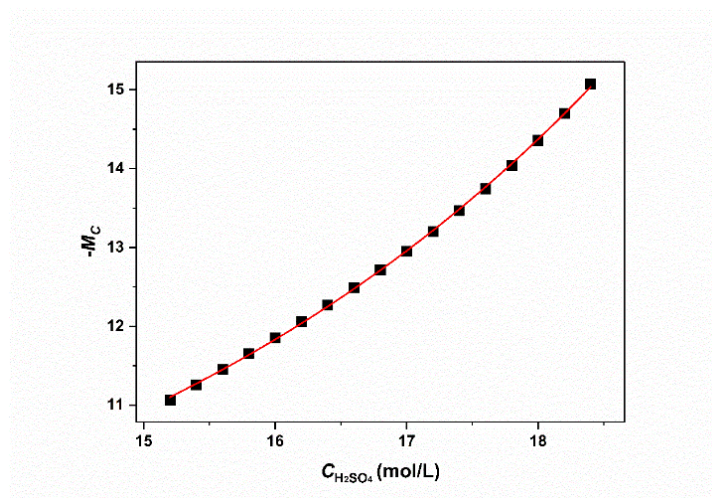

**Figure S4:** The results of polynomial fitting the data of  $M_C$  function at 298K.[1]

**Part 5. Values of  $nM_c$  and  $\lg\left(\frac{c_{\text{NO}_2^+}}{c_{\text{HNO}_3}}\right) + \lg k_0$  under different temperatures and  $\text{H}_2\text{SO}_4$  mass fraction**

**Table S1:** Values of  $nM_c$  and  $\lg\left(\frac{c_{\text{NO}_2^+}}{c_{\text{HNO}_3}}\right) + \lg k_0$  at different temperatures and  $\text{H}_2\text{SO}_4$  mass fraction.

| Mass fraction of $\text{H}_2\text{SO}_4$ (wt %) | Temperature (°C) | $\lg\left(\frac{c_{\text{NO}_2^+}}{c_{\text{HNO}_3}}\right) + \lg k_0$ | $nM_c$  |
|-------------------------------------------------|------------------|------------------------------------------------------------------------|---------|
| 88                                              | 30               | 11.285                                                                 | -12.931 |
|                                                 | 35               | 11.705                                                                 | -13.230 |
|                                                 | 40               | 12.226                                                                 | -13.592 |
| 90                                              | 30               | 12.015                                                                 | -13.275 |
|                                                 | 35               | 12.431                                                                 | -13.591 |
|                                                 | 40               | 12.947                                                                 | -14.023 |
| 92                                              | 30               | 12.745                                                                 | -13.871 |
|                                                 | 35               | 13.156                                                                 | -14.146 |
|                                                 | 40               | 13.668                                                                 | -14.567 |
| 94                                              | 30               | 13.476                                                                 | -14.462 |
|                                                 | 35               | 13.882                                                                 | -14.791 |
|                                                 | 40               | 14.389                                                                 | -15.209 |
| 96                                              | 30               | 14.206                                                                 | -15.225 |
|                                                 | 35               | 14.607                                                                 | -15.572 |
|                                                 | 40               | 15.110                                                                 | -16.053 |
| 98                                              | 30               | 14.936                                                                 | -16.026 |
|                                                 | 35               | 15.333                                                                 | -16.393 |
|                                                 | 40               | 15.831                                                                 | -16.859 |

## Part 6. Kinetic model validation experiments under different conditions

**Table S2:** Kinetic model validation experiments under different conditions

| Mass fraction of H <sub>2</sub> SO <sub>4</sub> (wt %) | Temperature (°C) | Time (min) | Theoretical conversion (%) | Actual conversion (%) | Errors (%) |
|--------------------------------------------------------|------------------|------------|----------------------------|-----------------------|------------|
| 94                                                     | 40               | 3.5        | 60                         | 62                    | 2          |
|                                                        |                  | 6.3        | 80                         | 81                    | 1          |
|                                                        |                  | 9.3        | 90                         | 86                    | 4          |
|                                                        | 35               | 4.2        | 60                         | 62                    | 2          |
|                                                        |                  | 5.6        | 70                         | 71                    | 1          |
|                                                        |                  | 7.6        | 80                         | 79                    | 1          |
|                                                        | 30               | 5.1        | 60                         | 61                    | 1          |
|                                                        |                  | 6.8        | 70                         | 69                    | 1          |
|                                                        |                  | 9.3        | 80                         | 78                    | 2          |
| 98                                                     | 40               | 5.6        | 60                         | 62                    | 2          |
|                                                        |                  | 7.4        | 70                         | 72                    | 2          |
|                                                        |                  | 10.2       | 80                         | 78                    | 2          |
|                                                        | 35               | 6.0        | 60                         | 59                    | 1          |
|                                                        |                  | 8.0        | 70                         | 70                    | 0          |
|                                                        |                  | 11.0       | 80                         | 77                    | 3          |
|                                                        | 30               | 6.4        | 60                         | 61                    | 1          |
|                                                        |                  | 8.6        | 70                         | 69                    | 1          |
|                                                        |                  | 11.7       | 80                         | 77                    | 3          |

## Part 7. Reaction optimization using kinetic models

**Table S3:** Reaction optimization using kinetic models.

| Mass fraction of H <sub>2</sub> SO <sub>4</sub> (wt %) | Temperature (°C) | Time (min) | Theoretical conversion (%) | Actual conversion (%) | Errors (%) |
|--------------------------------------------------------|------------------|------------|----------------------------|-----------------------|------------|
| 94                                                     | 45               | 7.8        | 90                         | 83.9                  | 6          |
|                                                        |                  | 10.3       | 95                         | 85.8                  | 9          |
|                                                        | 40               | 13.7       | 98                         | 87.6                  | 10         |
|                                                        |                  | 7.6        | 85                         | 81                    | 4          |
|                                                        |                  | 12.4       | 95                         | 87.4                  | 8          |
|                                                        |                  |            |                            |                       |            |

## References

1. Marziano, N. C.; Tomasin, A.; Traverso, P. G. *Journal of the Chemical Society, Perkin Transactions 2* **1981**, (7), 1070-1075, 10.1039/P29810001070.
